# Supplementary material for: The association of grip strength from midlife onwards with all-cause and cause-specific mortality over 17 years of follow-up in the Tromsø Study
Source: PubMed Central journal article supplement (PMC5136688; doi:10.1136/jech-2015-206776), 2016-05-26
Supplement: jech-2015-206776supp_table.pdf [file jech-2015-206776supp_table.pdf]

## APPENDIX

Table A1. All-cause and cause specific mortality hazard ratios (HR) by grip strength quintiles and age groups. Estimated in Cox regression.

|                                  | 50-59 years*      | 60-69 years*      | 70-80 years*      | 50-80 years*      | 50-80 years**     |
|----------------------------------|-------------------|-------------------|-------------------|-------------------|-------------------|
| <b>All-cause mortality</b>       |                   |                   |                   |                   |                   |
| Fifths of grip                   |                   |                   |                   |                   |                   |
| Low                              | 1.64 (1.21, 2.24) | 1.52 (1.25, 1.83) | 1.47 (1.18, 1.85) | 1.52 (1.33, 1.74) | 1.33 (1.16, 1.52) |
| 2                                | 1.21 (0.88, 1.67) | 1.29 (1.06, 1.58) | 1.32 (1.06, 1.65) | 1.27 (1.11, 1.46) | 1.13 (0.98, 1.30) |
| 3                                | 1.11 (0.80, 1.54) | 1.15 (0.94, 1.41) | 1.15 (0.91, 1.45) | 1.13 (0.99, 1.30) | 1.04 (0.98, 1.30) |
| 4                                | 1.06 (0.75, 1.49) | 1.00 (0.81, 1.23) | 1.19 (0.95, 1.50) | 1.08 (0.94, 1.25) | 1.00 (0.87, 1.16) |
| High                             | 1                 | 1                 | 1                 | 1                 | 1                 |
| Overall p-value:                 | 0.005             | <0.001            | 0.012             | <0.001            | <0.001            |
| Age by grip interaction: P=0.898 |                   |                   |                   |                   |                   |
| <b>CVD mortality</b>             |                   |                   |                   |                   |                   |
| Low                              | 1.37 (0.76, 2.48) | 1.88 (1.33, 2.65) | 1.80 (1.25, 2.58) | 1.66 (1.32, 2.10) | 1.39 (1.09, 1.77) |
| 2                                | 1.22 (0.67, 2.20) | 1.59 (1.11, 2.27) | 1.63 (1.15, 2.33) | 1.52 (1.20, 1.92) | 1.27 (1.00, 1.61) |
| 3                                | 1.20 (0.66, 2.16) | 1.47 (1.03, 2.10) | 1.31 (0.89, 1.92) | 1.32 (1.04, 1.68) | 1.18 (0.93, 1.51) |
| 4                                | 0.75 (0.37, 1.52) | 1.20 (0.83, 1.75) | 1.43 (0.99, 2.07) | 1.18 (0.92, 1.52) | 1.04 (0.81, 1.34) |
| High                             | 1                 | 1                 | 1                 | 1                 | 1                 |
| Overall p-value:                 | 0.444             | 0.003             | 0.019             | <0.001            | 0.035             |
| Age by grip interaction: P=0.827 |                   |                   |                   |                   |                   |
| <b>Cancer mortality</b>          |                   |                   |                   |                   |                   |
| Low                              | 1.78 (1.12, 2.81) | 1.11 (0.81, 1.53) | 1.14 (0.73, 1.78) | 1.22 (0.97, 1.53) | 1.15 (0.91, 1.45) |
| 2                                | 1.47 (0.92, 2.33) | 1.27 (0.93, 1.75) | 0.99 (0.64, 1.53) | 1.19 (0.95, 1.49) | 1.13 (0.90, 1.42) |
| 3                                | 1.28 (0.79, 2.07) | 1.08 (0.79, 1.49) | 0.70 (0.43, 1.14) | 1.03 (0.81, 1.29) | 0.98 (0.77, 1.23) |
| 4                                | 1.49 (0.93, 1.99) | 1.00 (0.72, 1.38) | 1.02 (0.66, 1.58) | 1.12 (0.89, 1.41) | 1.10 (0.87, 1.38) |
| High                             | 1                 | 1                 | 1                 | 1                 | 1                 |
| Overall p-value:                 | 0.156             | 0.510             | 0.413             | 0.332             | 0.539             |
| Age by grip interaction=0.438    |                   |                   |                   |                   |                   |

\* Adjusted by age, sex, and body size (BMI and height).

\*\* Adjusted by age, sex, and body size (BMI and height) + systolic blood pressure, total cholesterol,

triglycerides, self-reported general health status, self-reported history of heart attack, stroke, angina, asthma and diabetes, self-reported blood pressure treatment, smoking, leisure time physical activity, education.
